# Supplementary material for: Untargeted Metabolomics for Unraveling the Metabolic Changes in Planktonic and Sessile Cells of Salmonella Enteritidis ATCC 13076 after Treatment with Lippia origanoides Essential Oil
Source: MDPI journal article supplement (doi:10.3390/antibiotics12050899), 2023-05-12
Supplement: s1 [file s1]

# Untargeted Metabolomics for Unraveling the Metabolic Changes in Planktonic and Sessile Cells of *Salmonella* Enteritidis ATCC 13076 after Treatment with *Lippia origanoides* Essential Oil

Yuliany Guillín <sup>1</sup>, Marlon Cáceres <sup>2</sup>, Elena E. Stashenko <sup>3</sup>, William Hidalgo <sup>4,\*</sup> and Claudia Ortiz <sup>5</sup>

<sup>1</sup> Escuela de Biología, Universidad Industrial de Santander, Bucaramanga 680002, Colombia

<sup>2</sup> Escuela de Medicina, Universidad Industrial de Santander, Bucaramanga 680002, Colombia

<sup>3</sup> Center for Chromatography and Mass Spectrometry CROM-MASS, School of Chemistry, Universidad Industrial de Santander, Bucaramanga 680002, Colombia

<sup>4</sup> Escuela de Química, Universidad Industrial de Santander, Bucaramanga 680002, Colombia

<sup>5</sup> Escuela de Microbiología y Bioanálisis, Universidad Industrial de Santander, Bucaramanga 680002, Colombia

\* Correspondence: whidalgo@uis.edu.co

**Table S1.** Major constituents in the EOs studied. The relative amount of each compound is reported as a percentage (%).

| Code | Plant species                                          | Voucher             | Major compounds (>1%)                                                                                                                                                                                                                                                                      |
|------|--------------------------------------------------------|---------------------|--------------------------------------------------------------------------------------------------------------------------------------------------------------------------------------------------------------------------------------------------------------------------------------------|
| SA   | <i>Steiractinia aspera</i> Cuatrec.                    | UIS Herbarium 20891 | $\alpha$ -Pinene (24.9%), $\beta$ -pinene (14.8%), germacrene D (13.1%), $\beta$ -phellandrene (10.1%), $\alpha$ -phellandrene (6.3%), sabinene (4.6%), <i>p</i> -cymene (4.5%), <i>trans</i> - $\beta$ -caryophyllene (3.1%); $\alpha$ -copaene (2.6%), and limonene (2.4%).              |
| TD-I | <i>Turnera diffusa</i> Willd                           | UIS Herbarium 22037 | Dehydrofukinone (25.4%), aristolochene (17.9%), valencene (7.4%), $\beta$ -selinene (5.2%), <i>trans</i> - $\beta$ -caryophyllene (4.0%), $\beta$ -elemene (4.0%), premnaspirodien (3.7%), guaialol (3.5%), germacra-4,5,10-trien-1- $\alpha$ -ol (3.5%), and caryophyllene oxide (3.3%).  |
| LOP  | <i>Lippia origanoides</i> H.B.K Phellandrene chemotype | COL 560259          | <i>trans</i> - $\beta$ -Caryophyllene (18.6%), $\alpha$ -humulene (10.1%), $\alpha$ -phellandrene (9.3%), <i>p</i> -cymene (8.7%), 1,8-cineole (6.5%), limonene (4.4%), caryophyllene oxide (3.8%), $\beta$ -phellandrene (3.1%), camphene (2.5%), and germacrene D (2.2%).                |
| CM-I | <i>Calycolpus moritzianus</i> Burret                   | UIS Herbarium 21982 | 1,8-Cineole (19.1%), limonene (17.6%), <i>trans</i> - $\beta$ -caryophyllene (6.3%), viridiflorol (5.7%), $\alpha$ -pinene (5.1%), <i>trans</i> -geranyl linalool (4.0%), <i>trans</i> -nerolidol (3.5%), $\alpha$ -copaene (3.2%), selina-3,7(11)-diene (2.8%), and viridiflorine (2.7%). |
| PA   | <i>Piper aduncum</i> L.                                | COL 587136          | Piperitone (14.8%), <i>trans</i> - $\beta$ -caryophyllene (7.4%), viridiflorol (6.5%), limonene (6.0%), $\delta$ -cadinene (5.5%), $\alpha$ -pinene (4.6%), $\alpha$ -phellandrene (4.4%), caryophyllene oxide (3.8%), 1,8-cineole (3.6%), and <i>p</i> -cymene (3.0%).                    |
| EQ   | <i>Elaphandra quinquenervis</i> H.Rob                  | COL 587094          | Germacrene D (20.7%), $\alpha$ -phellandrene (9.1%), $\alpha$ -pinene (6.8%), <i>trans</i> - $\beta$ -caryophyllene (5.1%), $\Delta^3$ -carene (4.9%), limonene (4.5%), $\beta$ -cubebene (3.5%), $\alpha$ -humulene (2.6%), premnaspirodien (2.6%), and $\delta$ -cadinene (2.6%).        |
| HD   | <i>Hyptis dilatata</i> Benth                           | COL 582530          | <i>trans</i> - $\beta$ -Caryophyllene (20.2%), camphor (16.1%), $\Delta^3$ -carene (15.5%), $\alpha$ -pinene (10.5%), palustrol (8.7%), $\alpha$ -gurjunene (4.7%),                                                                                                                        |

| Code   | Plant species                                                          | Voucher                | Major compounds (>1%)                                                                                                                                                                                                                                                                                                                |
|--------|------------------------------------------------------------------------|------------------------|--------------------------------------------------------------------------------------------------------------------------------------------------------------------------------------------------------------------------------------------------------------------------------------------------------------------------------------|
|        |                                                                        |                        | ledol (3.4%), limonene (2.4%), camphene (1.7%), viridiflorine (1.5%), and aromadendrene (1.5%).                                                                                                                                                                                                                                      |
| LOC    | <i>L. origanoides</i> H.B.K<br>Carvacrol chemotype                     | UIS Herbarium<br>22034 | Carvacrol (35%), <i>p</i> -cymene (14.4%), thymol (8.0%), $\gamma$ -terpinene (5.3%), <i>trans</i> - $\beta$ -caryophyllene (4.4%), $\beta$ -myrcene (2.4%), carvacryl acetate (2.0%), methyl thymyl ether (1.9%), and $\alpha$ -terpinene (1.7%).                                                                                   |
| LOCpT  | <i>L. origanoides</i> H.B.K<br>$\beta$ -Caryophyllene-thymol chemotype | UIS Herbarium<br>22035 | <i>trans</i> - $\beta$ -Caryophyllene (15.1%), thymol (14%), 1,8-cineole (13%), <i>p</i> -cymene (12.6%), $\alpha$ -humulene (8.1%), $\alpha$ -phellandrene (7.1%), $\alpha$ -eudesmol (2.6%), caryophyllene oxide (2.5%), $\gamma$ -terpinene (2.4%), and limonene (2.1%).                                                          |
| LOT-I  | <i>L. origanoides</i> H.B.K<br>Thymol chemotype                        | COL 587107             | Thymol (75.3%), <i>trans</i> - $\beta$ -caryophyllene (5.4%), carvacrol (4.9%), $\alpha$ -humulene (3.2%), <i>p</i> -cymene (2.3%), thymyl acetate (1.6%), methyl thymyl ether (1.3%), caryophyllene oxide (1.3%), and <i>trans</i> - $\beta$ -bergamotene (1.0%).                                                                   |
| TD-II  | <i>T. diffusa</i><br>Willd                                             | UIS Herbarium<br>22032 | Aristolechene (20.9%), dehydrofukinone (19.3%), valencene (6.5%), $\beta$ -selinene (5.8%), $\beta$ -elemene (5.0%), <i>trans</i> - $\beta$ -caryophyllene (4.9%), premnaspirodien (4.7%), <i>p</i> -cymene (3.6%), germacrene-4,5,10-trien-1- $\alpha$ -ol (3.6%), and guaiol (3.3%).                                               |
| SV     | <i>Satureja viminea</i> (L.)<br>Kuntze                                 | COL 566449             | <i>p</i> -Menth-3-en-8-ol (32.4%), pulegone (16.1%), <i>trans</i> -9- <i>epi</i> -caryophyllene (8.9%), <i>trans</i> - $\beta$ -caryophyllene (8.4%), caryophyllene oxide (4.3%), spathulenol (3.6%), benzyl benzoate (2.4%), $\delta$ -cadinene (2.2%), <i>trans</i> -pulegol (1.8%), and <i>p</i> -mentha-3,8-diene (1.5%).        |
| PS     | <i>Psidium sartorianum</i><br>(O.Berg) Nied                            | COL 578359             | <i>trans</i> - $\beta$ -Caryophyllene (12.7%), caryophyllene oxide (12.0%), dehydrofukinone (7.5%), caryophylla-4(12),8(13)-dien-5- $\beta$ -ol (4.8%), germacrene B (4.1%), 1,8-cineole (3.7%), <i>p</i> -cymene (2.9%), $\beta$ -pinene (2.7%), selina-3,7(11)-diene (2.5%), $\beta$ -selinene (2.1%), and premnaspirodien (2.0%). |
| VC     | <i>Varronia curassavica</i><br>Jacq.                                   | COL 559446             | <i>trans</i> - $\beta$ -Caryophyllene (19.2%), germacrene D (12.3%), <i>trans</i> - $\beta$ -guaiane (11.8%), $\alpha$ -pinene (9.4%), $\alpha$ -copaene (7.0%), $\beta$ -pinene (4.1%), bicyclgermacrene (3.9%), $\beta$ -elemene (2.8%), $\delta$ -cadinene (2.8%), and $\alpha$ -humulene (2.7%).                                 |
| OB     | <i>Ocimum basilicum</i> L.                                             | UIS Herbarium<br>22227 | Linalool (42.7%), estragole (18.6%), 1,8-cineole (8.1%), germacrene D (4.9%), <i>epi</i> - $\alpha$ -cadinol (4.2%), $\gamma$ -cadinene (3.7%), $\alpha$ -humulene (2.5%), $\beta$ -elemene (2.2%), bicyclgermacrene (2.2%), and <i>trans</i> - $\alpha$ -bergamotene (1.1%).                                                        |
| CM-II  | <i>C. moritzianus</i><br>Burret                                        | UIS Herbarium<br>21982 | 1,8-Cineole (15.4%), limonene (14.7%), viridiflorol (7.1%), <i>trans</i> -geranyllinalool (6.7%), <i>trans</i> - $\beta$ -caryophyllene (6.2%), $\beta$ -selinene (5.8%), <i>trans</i> -nerolidol (4.0%), $\alpha$ -pinene (3.5%), selina-3,7(11)-diene (3.0%), and $\alpha$ -copaene (3.0%).                                        |
| TD-III | <i>T. diffusa</i><br>Willd                                             | Herbarium UIS<br>22037 | Aristolochene (20.6%), dehydrofukinone (17.3%), <i>p</i> -cymene (5.8%), $\beta$ -selinene (5.6%), valencene (5.2%), premnaspirodien (4.2%), caryophyllene oxide (3.6%), <i>trans</i> - $\beta$ -caryophyllene (2.8%), germacrene-4,5,10-trien-1- $\alpha$ -ol (2.4%).                                                               |
| LOTc   | <i>L. origanoides</i> H.B.K<br>Thymol- <i>p</i> -cymene chemotype      | Herbarium UIS<br>22039 | Thymol (49.4%), <i>p</i> -cymene (19.1%), $\gamma$ -terpinene (9.2%), $\beta$ -myrcene (5.2%), $\alpha$ -terpinene (2.9%), carvacrol (2.7%), methyl thymyl ether (1.8%), <i>trans</i> - $\beta$ -caryophyllene (1.6%), <i>cis</i> - $\beta$ -ocimene (1.2%), and limonene (0.9%).                                                    |
| LOT-II | <i>L. origanoides</i> H.B.K<br>Thymol chemotype                        | Herbarium UIS<br>22036 | Thymol (71.7%), <i>p</i> -cymene (10.5%), carvacrol (4.4%), $\beta$ -myrcene (2.1%), $\gamma$ -terpinene (2.0%), caryophyllene oxide (1.6%), methyl                                                                                                                                                                                  |

| Code | Plant species               | Voucher    | Major compounds (>1%)                                                                                                                                                                                                                                                                                      |
|------|-----------------------------|------------|------------------------------------------------------------------------------------------------------------------------------------------------------------------------------------------------------------------------------------------------------------------------------------------------------------|
|      |                             |            | thymyl ether (0.9%), <i>trans</i> - $\beta$ -caryophyllene (0.9%), humulene epoxide II (0.7%), and terpinen-4-ol (0.7%).                                                                                                                                                                                   |
| LM   | <i>L. micromera</i> Schauer | COL 560986 | <i>p</i> -Cymene (26.8%), methyl thymyl ether (26.3%), thymol (17.8%), thymyl acetate (5.7%), $\gamma$ -terpinene (5.4%), 1,8-cineole (5.1%), $\alpha$ -terpinene (2.0%), $\beta$ -myrcene (2.0%), <i>trans</i> - $\beta$ -caryophyllene (1.7%), $\alpha$ -thujene (1.3%), and caryophyllene oxide (0.9%). |

**Table S2.** Putatively identified metabolites altered by the effect of *L. origanoides* LOT-II EO in planktonic cells of *S. Enteritidis*.

| Metabolite                               | Formula                                                                         | Adduct                                | <i>m/z</i>  | $\Delta$ ppm | RT   | Modulated | Ionization mode |
|------------------------------------------|---------------------------------------------------------------------------------|---------------------------------------|-------------|--------------|------|-----------|-----------------|
| Glutathione disulfide                    | C <sub>20</sub> H <sub>32</sub> N <sub>6</sub> O <sub>12</sub> S <sub>2</sub>   | [M-H] <sup>-</sup>                    | 611.1434477 | 1.11         | 1.08 | DOWN      | ESI(-)          |
| Glutathione                              | C <sub>10</sub> H <sub>17</sub> N <sub>3</sub> O <sub>6</sub> S                 | [M-H] <sup>-</sup>                    | 306.076014  | 0.11         | 1.16 | DOWN      | ESI(-)          |
| Cytidine                                 | C <sub>9</sub> H <sub>13</sub> N <sub>3</sub> O <sub>5</sub>                    | [M-H] <sup>-</sup>                    | 242.0775838 | 0.43         | 0.85 | UP        | ESI(-)          |
| 2'-Deoxyuridine                          | C <sub>9</sub> H <sub>12</sub> N <sub>2</sub> O <sub>5</sub>                    | [M-H] <sup>-</sup>                    | 227.0665    | 1.27         | 2.04 | DOWN      | ESI(-)          |
| 2,5-Dioxopentanoate                      | C <sub>5</sub> H <sub>6</sub> O <sub>4</sub>                                    | [M-H] <sup>-</sup>                    | 129.0181634 | 4.77         | 0.49 | UP        | ESI(-)          |
| Gly Asp Val                              | C <sub>11</sub> H <sub>19</sub> N <sub>3</sub> O <sub>6</sub>                   | [M-H] <sup>-</sup>                    | 288.1196335 | 0.25         | 0.96 | DOWN      | ESI(-)          |
| 2',3'-Cyclic AMP                         | C <sub>10</sub> H <sub>12</sub> N <sub>5</sub> O <sub>6</sub> P                 | [M-H] <sup>-</sup>                    | 328.0447135 | 0.07         | 2.00 | UP        | ESI(-)          |
| Thymidine                                | C <sub>10</sub> H <sub>14</sub> N <sub>2</sub> O <sub>5</sub>                   | [M-H] <sup>-</sup>                    | 241.0823454 | 0.39         | 2.78 | DOWN      | ESI(-)          |
| Pantoate                                 | C <sub>6</sub> H <sub>12</sub> O <sub>4</sub>                                   | [(M-H)-H <sub>2</sub> O] <sup>-</sup> | 129.0545647 | 4.61         | 3.06 | DOWN      | ESI(-)          |
| Malic acid                               | C <sub>4</sub> H <sub>6</sub> O <sub>5</sub>                                    | [(M-H)-H <sub>2</sub> O] <sup>-</sup> | 115.0024718 | 5.72         | 0.49 | DOWN      | ESI(-)          |
| Serylcysteine                            | C <sub>6</sub> H <sub>12</sub> N <sub>2</sub> O <sub>4</sub> S                  | [(M-H)-H <sub>2</sub> O] <sup>-</sup> | 189.0329752 | 2.14         | 0.53 | UP        | ESI(-)          |
| Cys Thr Cys                              | C <sub>10</sub> H <sub>19</sub> N <sub>3</sub> O <sub>5</sub> S <sub>2</sub>    | [(M-H)-H <sub>2</sub> O] <sup>-</sup> | 306.0573702 | 2.77         | 1.16 | DOWN      | ESI(-)          |
| Uridine                                  | C <sub>9</sub> H <sub>12</sub> N <sub>2</sub> O <sub>6</sub>                    | [M-H] <sup>-</sup>                    | 243.0616018 | 0.44         | 1.36 | DOWN      | ESI(-)          |
| O-Succinyl-homoserine                    | C <sub>8</sub> H <sub>13</sub> NO <sub>6</sub>                                  | [(M-H)-H <sub>2</sub> O] <sup>-</sup> | 200.055546  | 1.71         | 1.16 | DOWN      | ESI(-)          |
| Gln-Pro                                  | C <sub>10</sub> H <sub>17</sub> N <sub>3</sub> O <sub>4</sub>                   | [M-H] <sup>-</sup>                    | 242.1139328 | 0.60         | 0.93 | UP        | ESI(-)          |
| 2-oxoglutaramate                         | C <sub>5</sub> H <sub>7</sub> NO <sub>4</sub>                                   | [2M-H] <sup>-</sup>                   | 289.0672693 | 0.30         | 1.36 | DOWN      | ESI(-)          |
| Pro Gly Gln                              | C <sub>12</sub> H <sub>20</sub> N <sub>4</sub> O <sub>5</sub>                   | [M-H] <sup>-</sup>                    | 299.1355365 | 0.01         | 0.53 | DOWN      | ESI(-)          |
| 3'-Keto-3'-deoxy-AMP                     | C <sub>10</sub> H <sub>11</sub> N <sub>5</sub> O <sub>7</sub> P                 | [M-H] <sup>-</sup>                    | 344.0394785 | 0.35         | 1.80 | UP        | ESI(-)          |
| 3-Hydroxy-2-methylpyridine-5-carboxylate | C <sub>7</sub> H <sub>7</sub> NO <sub>3</sub>                                   | [M-H] <sup>-</sup>                    | 152.0341913 | 3.74         | 1.40 | DOWN      | ESI(-)          |
| Adenine                                  | C <sub>5</sub> H <sub>5</sub> N <sub>5</sub>                                    | [M-H] <sup>-</sup>                    | 134.0460744 | 444          | 0.81 | DOWN      | ESI(-)          |
| Formiminoglutamic acid                   | C <sub>6</sub> H <sub>10</sub> N <sub>2</sub> O <sub>4</sub>                    | [(M-H)-H <sub>2</sub> O] <sup>-</sup> | 155.045069  | 3.81         | 0.73 | UP        | ESI(-)          |
| Asn Leu Asp                              | C <sub>14</sub> H <sub>24</sub> N <sub>4</sub> O <sub>7</sub>                   | [M-H] <sup>-</sup>                    | 359.1566792 | 0.02         | 2.87 | DOWN      | ESI(-)          |
| Methionine                               | C <sub>5</sub> H <sub>11</sub> NO <sub>2</sub> S                                | [M-H] <sup>-</sup>                    | 148.0425725 | 4.37         | 0.69 | DOWN      | ESI(-)          |
| N-(3-Oxoheptanoyl)homoserine lactone     | C <sub>11</sub> H <sub>17</sub> NO <sub>3</sub> S                               | [M-H] <sup>-</sup>                    | 242.0856159 | 2.21         | 2.08 | DOWN      | ESI(-)          |
| Asp Lys Pro                              | C <sub>15</sub> H <sub>26</sub> N <sub>4</sub> O <sub>6</sub>                   | [M-H] <sup>-</sup>                    | 357.1774182 | 0.05         | 3.07 | DOWN      | ESI(-)          |
| Leu His Val                              | C <sub>21</sub> H <sub>33</sub> N <sub>3</sub> O <sub>4</sub>                   | [(M+Na)-2H] <sup>-</sup>              | 412.2194875 | 4.20         | 3.55 | UP        | ESI(-)          |
| 2-Hydroxyethanesulfonate                 | C <sub>2</sub> H <sub>6</sub> O <sub>4</sub> S                                  | [M-H] <sup>-</sup>                    | 124.9902573 | 4.74         | 0.51 | DOWN      | ESI(-)          |
| Threonate                                | C <sub>4</sub> H <sub>8</sub> O <sub>5</sub>                                    | [M-H] <sup>-</sup>                    | 135.0287462 | 4.39         | 0.65 | DOWN      | ESI(-)          |
| Erythronic acid                          | C <sub>4</sub> H <sub>8</sub> O <sub>5</sub>                                    | [(M-H)-H <sub>2</sub> O] <sup>-</sup> | 117.0181309 | 5.54         | 1.08 | DOWN      | ESI(-)          |
| 3-Phosphoadenylylselenate                | C <sub>10</sub> H <sub>15</sub> N <sub>5</sub> O <sub>13</sub> P <sub>2</sub> S | [M-3H] <sup>-</sup>                   | 183.9692942 | 1.23         | 0.85 | UP        | ESI(-)          |
| Glutamylglycine                          | C <sub>7</sub> H <sub>12</sub> N <sub>2</sub> O <sub>5</sub>                    | [(M-H)-H <sub>2</sub> O] <sup>-</sup> | 185.0557955 | 2.34         | 0.77 | DOWN      | ESI(-)          |

|                                                   |                                                                 |                                       |             |      |      |      |         |
|---------------------------------------------------|-----------------------------------------------------------------|---------------------------------------|-------------|------|------|------|---------|
| Val-Asn                                           | C <sub>9</sub> H <sub>17</sub> N <sub>3</sub> O <sub>4</sub>    | [M-H] <sup>-</sup>                    | 230.1139313 | 0.64 | 1.36 | DOWN | ESI(-)  |
| 2-(2-Carboxy-4-methylthiazol-5-yl)ethyl phosphate | C <sub>7</sub> H <sub>10</sub> NO <sub>6</sub> PS               | [M-H] <sup>-</sup>                    | 265.9883458 | 1.74 | 1.11 | DOWN | ESI(-)  |
| Asn Leu Asp                                       | C <sub>14</sub> H <sub>24</sub> N <sub>4</sub> O <sub>7</sub>   | [(M-H)-H <sub>2</sub> O] <sup>-</sup> | 341.1460239 | 0.22 | 0.53 | DOWN | ESI(-)  |
| Leucinic acid                                     | C <sub>6</sub> H <sub>12</sub> O <sub>3</sub>                   | [M-H] <sup>-</sup>                    | 131.0702067 | 4.60 | 4.3  | DOWN | ESI(-)  |
| Inosine                                           | C <sub>10</sub> H <sub>12</sub> N <sub>4</sub> O <sub>5</sub>   | [M-H] <sup>-</sup>                    | 267.0729551 | 0.05 | 2.35 | DOWN | ESI(-)  |
| Guanosine                                         | C <sub>10</sub> H <sub>13</sub> N <sub>5</sub> O <sub>5</sub>   | [M-H] <sup>-</sup>                    | 282.0838703 | 0.10 | 2.40 | DOWN | ESI(-)  |
| gamma-Glutamylvaline                              | C <sub>10</sub> H <sub>18</sub> N <sub>2</sub> O <sub>5</sub>   | [M-H] <sup>-</sup>                    | 245.1135962 | 0.58 | 1.32 | DOWN | ESI(-)  |
| Glutaminylleucine                                 | C <sub>11</sub> H <sub>21</sub> N <sub>3</sub> O <sub>4</sub>   | [M-H] <sup>-</sup>                    | 258.1454303 | 0.19 | 2.87 | UP   | ESI(-)  |
| 5-Ureido-4-imidazole carboxylate                  | C <sub>5</sub> H <sub>6</sub> N <sub>4</sub> O <sub>3</sub>     | [(M-H)-H <sub>2</sub> O] <sup>-</sup> | 151.0249536 | 4.28 | 1.12 | UP   | ESI(-)  |
| Hydroxypropanedioic acid                          | C <sub>3</sub> H <sub>4</sub> O <sub>5</sub>                    | [M-H] <sup>-</sup>                    | 118.9974038 | 5.34 | 1.76 | DOWN | ESI(-)  |
| 3,4-Dihydroxymandelic acid                        | C <sub>8</sub> H <sub>8</sub> O <sub>5</sub>                    | [(M-H)-H <sub>2</sub> O] <sup>-</sup> | 165.0182595 | 3.15 | 3.53 | DOWN | ESI(-)  |
| Phenylalanine                                     | C <sub>9</sub> H <sub>11</sub> NO <sub>2</sub>                  | [M-H] <sup>-</sup>                    | 164.0706391 | 3.11 | 2.44 | DOWN | ESI(-)  |
| 5-Hydroxyisourate                                 | C <sub>5</sub> H <sub>4</sub> N <sub>4</sub> O <sub>4</sub>     | [(M-H)-H <sub>2</sub> O] <sup>-</sup> | 165.0043526 | 3.07 | 0.88 | UP   | ESI(-)  |
| Thr Gly Pro                                       | C <sub>11</sub> H <sub>19</sub> N <sub>3</sub> O <sub>5</sub>   | [(M+H)-H <sub>2</sub> O] <sup>+</sup> | 256.1287395 | 3.86 | 0.50 | UP   | ESI (+) |
| N1-Acetylspermidine                               | C <sub>9</sub> H <sub>21</sub> N <sub>3</sub> O                 | [M+H] <sup>+</sup>                    | 188.1756703 | 3.24 | 0.47 | UP   | ESI (+) |
| 12-amino-dodecanoic acid                          | C <sub>12</sub> H <sub>25</sub> NO <sub>2</sub>                 | [(M+H)-H <sub>2</sub> O] <sup>+</sup> | 198.1851465 | 3.19 | 5.55 | DOWN | ESI (+) |
| N-Acetylputrescine                                | C <sub>6</sub> H <sub>14</sub> N <sub>2</sub> O                 | [M+H] <sup>+</sup>                    | 131.1180264 | 3.07 | 0.51 | UP   | ESI (+) |
| Biotin                                            | C <sub>10</sub> H <sub>16</sub> N <sub>2</sub> O <sub>3</sub> S | [M+H] <sup>+</sup>                    | 245.0958319 | 0.60 | 0.82 | UP   | ESI (+) |
| Cytosine                                          | C <sub>4</sub> H <sub>5</sub> N <sub>3</sub> O                  | [M+H] <sup>+</sup>                    | 112.0508077 | 2.43 | 0.51 | UP   | ESI (+) |
| Isoleucine                                        | C <sub>6</sub> H <sub>13</sub> NO <sub>2</sub>                  | [(M+H)-H <sub>2</sub> O] <sup>+</sup> | 114.0915482 | 2.90 | 0.51 | UP   | ESI (+) |
| Glutathione                                       | C <sub>10</sub> H <sub>17</sub> N <sub>3</sub> O <sub>6</sub> S | [M+H] <sup>+</sup>                    | 308.090624  | 3.26 | 0.54 | DOWN | ESI (+) |
| 2-Phenylpropanal                                  | C <sub>9</sub> H <sub>10</sub> O                                | [2M+Na] <sup>+</sup>                  | 291.1376434 | 5.33 | 0.96 | DOWN | ESI (+) |
| 2-Hydroxy-2-ethylsuccinic acid                    | C <sub>6</sub> H <sub>10</sub> O <sub>5</sub>                   | [M+H] <sup>+</sup>                    | 163.0613814 | 4.54 | 1.17 | UP   | ESI (+) |
| 12-amino-dodecanoic acid                          | C <sub>12</sub> H <sub>25</sub> NO <sub>2</sub>                 | [M+H] <sup>+</sup>                    | 216.1957101 | 2.95 | 5.56 | DOWN | ESI (+) |
| Ribose                                            | C <sub>5</sub> H <sub>10</sub> O <sub>5</sub>                   | [(M+H)-H <sub>2</sub> O] <sup>+</sup> | 133.0495374 | 4.07 | 0.51 | UP   | ESI (+) |
| Pantothenate                                      | C <sub>9</sub> H <sub>17</sub> NO <sub>5</sub>                  | [M+H] <sup>+</sup>                    | 220.1178505 | 2.90 | 2.94 | DOWN | ESI (+) |
| 1-palmitoylglycerophosphocholine                  | C <sub>24</sub> H <sub>51</sub> NO <sub>7</sub> P               | [M+2Na] <sup>+</sup>                  | 271.1590589 | 3.19 | 0.54 | DOWN | ESI (+) |
| N6,N6,N6-Trimethyl-lysine                         | C <sub>9</sub> H <sub>20</sub> N <sub>2</sub> O <sub>2</sub>    | [(M+H)-H <sub>2</sub> O] <sup>+</sup> | 171.1491314 | 3.49 | 0.47 | UP   | ESI (+) |
| Histidinyl-Hydroxyproline                         | C <sub>11</sub> H <sub>16</sub> N <sub>4</sub> O <sub>4</sub>   | [M+H] <sup>+</sup>                    | 269.1240566 | 3.43 | 0.78 | UP   | ESI (+) |
| Citric acid                                       | C <sub>6</sub> H <sub>8</sub> O <sub>7</sub>                    | [(M+H)-H <sub>2</sub> O] <sup>+</sup> | 175.0235655 | 3.96 | 0.77 | UP   | ESI (+) |
| Cytidine                                          | C <sub>9</sub> H <sub>13</sub> N <sub>3</sub> O <sub>5</sub>    | [M+H] <sup>+</sup>                    | 244.092565  | 3.17 | 0.82 | UP   | ESI (+) |
| Glutaminylglutamine                               | C <sub>10</sub> H <sub>18</sub> N <sub>4</sub> O <sub>5</sub>   | [M+H] <sup>+</sup>                    | 275.1346363 | 3.28 | 1.05 | UP   | ESI (+) |
| Glycerol                                          | C <sub>3</sub> H <sub>8</sub> O <sub>3</sub>                    | [M+Na] <sup>+</sup>                   | 115.0369811 | 1.12 | 0.86 | UP   | ESI (+) |
| Acetyl tributyl citrate                           | C <sub>20</sub> H <sub>34</sub> O <sub>8</sub>                  | [M+H] <sup>+</sup>                    | 403.2320393 | 2.85 | 8.64 | UP   | ESI (+) |
| Arbutin                                           | C <sub>12</sub> H <sub>16</sub> O <sub>7</sub>                  | [M+H] <sup>+</sup>                    | 273.0965514 | 3.18 | 8.63 | UP   | ESI (+) |
| N-Acetylcadaverine                                | C <sub>7</sub> H <sub>16</sub> N <sub>2</sub> O                 | [M+H] <sup>+</sup>                    | 145.1335297 | 3.79 | 0.88 | UP   | ESI (+) |
| N-Cyclohexylformamide                             | C <sub>7</sub> H <sub>13</sub> NO                               | [M+H] <sup>+</sup>                    | 128.1070842 | 3.47 | 6.19 | UP   | ESI (+) |
| 5-Hydroxykynurenine                               | C <sub>10</sub> H <sub>12</sub> N <sub>2</sub> O <sub>4</sub>   | [M+2H] <sup>+</sup>                   | 113.0477629 | 0.77 | 0.82 | UP   | ESI (+) |
| Arg Val Ser                                       | C <sub>14</sub> H <sub>28</sub> N <sub>6</sub> O <sub>5</sub>   | [M+H] <sup>+</sup>                    | 361.2215333 | 4.41 | 8.64 | UP   | ESI (+) |

|                                                |                                                                               |                                       |             |      |      |      |         |
|------------------------------------------------|-------------------------------------------------------------------------------|---------------------------------------|-------------|------|------|------|---------|
| 4-Dimethylamino-phenyl-alanine                 | C <sub>11</sub> H <sub>16</sub> N <sub>2</sub> O <sub>2</sub>                 | [M+H] <sup>+</sup>                    | 209.1282274 | 3.69 | 0.51 | DOWN | ESI (+) |
| Benzylsuccinic acid                            | C <sub>11</sub> H <sub>12</sub> O <sub>4</sub>                                | [M+H] <sup>+</sup>                    | 209.0807856 | 2.84 | 6.70 | DOWN | ESI (+) |
| 1-(beta-Ribofuranosyl)-1,4-dihydronicotinamide | C <sub>11</sub> H <sub>16</sub> N <sub>2</sub> O <sub>5</sub>                 | [M+H] <sup>+</sup>                    | 257.1127145 | 3.98 | 2.32 | DOWN | ESI (+) |
| Ser Arg Tyr                                    | C <sub>18</sub> H <sub>28</sub> N <sub>6</sub> O <sub>6</sub>                 | [M+H] <sup>+</sup>                    | 425.2138845 | 2.27 | 8.64 | UP   | ESI (+) |
| Oxoglutaric acid                               | C <sub>5</sub> H <sub>6</sub> O <sub>5</sub>                                  | [(M+H)-H <sub>2</sub> O] <sup>+</sup> | 129.0183033 | 3.69 | 8.65 | UP   | ESI (+) |
| Xanthine                                       | C <sub>5</sub> H <sub>4</sub> N <sub>4</sub> O <sub>2</sub>                   | [M+H] <sup>+</sup>                    | 153.0406565 | 3.87 | 1.13 | UP   | ESI (+) |
| 2-Furancarboxaldehyde                          | C <sub>5</sub> H <sub>4</sub> O <sub>2</sub>                                  | [M+H] <sup>+</sup>                    | 97.02875159 | 2.04 | 0.47 | DOWN | ESI (+) |
| 3-(3,4-dihydroxy-phenyl)prop-2-enoic acid      | C <sub>9</sub> H <sub>8</sub> O <sub>4</sub>                                  | [M+H] <sup>+</sup>                    | 181.0494479 | 3.49 | 6.70 | DOWN | ESI (+) |
| dTDP-forosamine                                | C <sub>18</sub> H <sub>31</sub> N <sub>3</sub> O <sub>12</sub> P <sub>2</sub> | [M+3H] <sup>+</sup>                   | 182.0528667 | 5.76 | 6.70 | DOWN | ESI (+) |
| Adenine                                        | C <sub>5</sub> H <sub>5</sub> N <sub>5</sub>                                  | [M+H] <sup>+</sup>                    | 136.0617373 | 4.28 | 3.70 | DOWN | ESI (+) |
| Arginyl-Tyrosine                               | C <sub>15</sub> H <sub>23</sub> N <sub>5</sub> O <sub>4</sub>                 | [M+H] <sup>+</sup>                    | 338.1818176 | 2.96 | 1.09 | DOWN | ESI (+) |
| 5-Hydroxyectoine                               | C <sub>6</sub> H <sub>10</sub> N <sub>2</sub> O <sub>3</sub>                  | [M+H] <sup>+</sup>                    | 159.0763844 | 3.61 | 0.49 | DOWN | ESI (+) |
| Gentisate aldehyde                             | C <sub>7</sub> H <sub>6</sub> O <sub>3</sub>                                  | [(M+H)-H <sub>2</sub> O] <sup>+</sup> | 121.0286007 | 2.88 | 9.87 | DOWN | ESI (+) |
| Phenylalanyl-Arginine                          | C <sub>15</sub> H <sub>23</sub> N <sub>5</sub> O <sub>3</sub>                 | [M+H] <sup>+</sup>                    | 322.1868297 | 3.35 | 2.28 | DOWN | ESI (+) |
| 4-Acetamido-2-aminobutanoic acid               | C <sub>6</sub> H <sub>12</sub> N <sub>2</sub> O <sub>3</sub>                  | [M+H] <sup>+</sup>                    | 161.0920366 | 3.55 | 0.51 | UP   | ESI (+) |
| 5-Hydroxykynurenine                            | C <sub>10</sub> H <sub>12</sub> N <sub>2</sub> O <sub>4</sub>                 | [M+2H] <sup>+</sup>                   | 113.0478575 | 1.65 | 0.51 | DOWN | ESI (+) |
| Methionine                                     | C <sub>5</sub> H <sub>11</sub> NO <sub>2</sub> S                              | [M+H] <sup>+</sup>                    | 150.0582532 | 4.11 | 0.70 | DOWN | ESI (+) |
| Aconitic acid                                  | C <sub>6</sub> H <sub>6</sub> O <sub>6</sub>                                  | [(M+H)-H <sub>2</sub> O] <sup>+</sup> | 139.0025748 | 3.99 | 8.64 | UP   | ESI (+) |
| Histamine                                      | C <sub>5</sub> H <sub>9</sub> N <sub>3</sub>                                  | [M+H] <sup>+</sup>                    | 112.0871771 | 2.61 | 0.46 | UP   | ESI (+) |
| 5-oxo-pentanoic acid                           | C <sub>5</sub> H <sub>8</sub> O <sub>3</sub>                                  | [M+H] <sup>+</sup>                    | 117.0548172 | 2.92 | 0.50 | UP   | ESI (+) |
| Pyridoxamine 5'-phosphate                      | C <sub>8</sub> H <sub>13</sub> N <sub>2</sub> O <sub>5</sub> P                | [M+2H] <sup>+</sup>                   | 125.0365667 | 5.17 | 0.51 | DOWN | ESI (+) |
| gamma-Glutamyl-gamma-aminobutyraldehyde        | C <sub>9</sub> H <sub>16</sub> N <sub>2</sub> O <sub>4</sub>                  | [M+H] <sup>+</sup>                    | 217.1181573 | 3.09 | 4.60 | DOWN | ESI (+) |
| Gamma-glutamyl-putrescine                      | C <sub>9</sub> H <sub>19</sub> N <sub>3</sub> O <sub>3</sub>                  | [(M+H)-H <sub>2</sub> O] <sup>+</sup> | 200.1392363 | 3.31 | 0.70 | DOWN | ESI (+) |
| Pyroglutamic acid                              | C <sub>5</sub> H <sub>7</sub> NO <sub>3</sub>                                 | [M+H] <sup>+</sup>                    | 130.0499772 | 3.32 | 0.82 | DOWN | ESI (+) |
| Urocanic acid                                  | C <sub>6</sub> H <sub>6</sub> N <sub>2</sub> O <sub>2</sub>                   | [(M+H)-H <sub>2</sub> O] <sup>+</sup> | 121.0398063 | 3.08 | 1.04 | UP   | ESI (+) |
| Cyclic GMP                                     | C <sub>10</sub> H <sub>12</sub> N <sub>5</sub> O <sub>7</sub> P               | [M+H] <sup>+</sup>                    | 346.0542684 | 2.83 | 1.77 | UP   | ESI (+) |
| 2-Phenylacetamide                              | C <sub>8</sub> H <sub>9</sub> NO                                              | [M+H] <sup>+</sup>                    | 136.0757    | 3.89 | 3.77 | DOWN | ESI (+) |
| 4-Imidazolone-5-propionic acid                 | C <sub>6</sub> H <sub>8</sub> N <sub>2</sub> O <sub>3</sub>                   | [M+H] <sup>+</sup>                    | 157.0607652 | 3.46 | 0.50 | DOWN | ESI (+) |
| Lysine                                         | C <sub>6</sub> H <sub>14</sub> N <sub>2</sub> O <sub>2</sub>                  | [(M+H)-H <sub>2</sub> O] <sup>+</sup> | 129.1023572 | 3.27 | 0.50 | DOWN | ESI (+) |
| Proline                                        | C <sub>5</sub> H <sub>9</sub> NO <sub>2</sub>                                 | [M+H] <sup>+</sup>                    | 116.0707922 | 3.08 | 0.51 | DOWN | ESI (+) |
| Alanine                                        | C <sub>3</sub> H <sub>7</sub> NO <sub>2</sub>                                 | [M+H] <sup>+</sup>                    | 90.05536955 | 1.44 | 0.47 | DOWN | ESI (+) |
| Phenylpyruvic acid                             | C <sub>9</sub> H <sub>8</sub> O <sub>3</sub>                                  | [M+H] <sup>+</sup>                    | 165.0545978 | 3.40 | 1.09 | DOWN | ESI (+) |
| Pyridoxamine                                   | C <sub>8</sub> H <sub>12</sub> N <sub>2</sub> O <sub>2</sub>                  | [M+H] <sup>+</sup>                    | 169.0970723 | 3.71 | 2.71 | DOWN | ESI (+) |
| 2'-Deoxyadenosine                              | C <sub>10</sub> H <sub>13</sub> N <sub>5</sub> O <sub>3</sub>                 | [M+H] <sup>+</sup>                    | 252.1089583 | 2.78 | 2.57 | DOWN | ESI (+) |
| Creatinine                                     | C <sub>4</sub> H <sub>7</sub> N <sub>3</sub> O                                | [M+H] <sup>+</sup>                    | 114.066471  | 2.27 | 0.50 | DOWN | ESI (+) |

\*RT: retention time.

**Table S3.** Putatively identified metabolites altered by the effect of LOT-II EO in sessile cells of *S. Enteritidis*.

| Metabolite             | Formula                                                      | Adduct                                | m/z       | Δppm | RT   | Modulated | Ionization mode |
|------------------------|--------------------------------------------------------------|---------------------------------------|-----------|------|------|-----------|-----------------|
| Formiminoglutamic acid | C <sub>6</sub> H <sub>10</sub> N <sub>2</sub> O <sub>4</sub> | [(M-H)-H <sub>2</sub> O] <sup>-</sup> | 155.04506 | 3.81 | 0.54 | UP        | ESI(-)          |

|                                                   |                                                                                 |                                       |           |      |      |      |        |
|---------------------------------------------------|---------------------------------------------------------------------------------|---------------------------------------|-----------|------|------|------|--------|
| Cyclic AMP                                        | C <sub>10</sub> H <sub>12</sub> N <sub>5</sub> O <sub>6</sub> P                 | [M-H] <sup>-</sup>                    | 328.04478 | 0.29 | 1.69 | DOWN | ESI(-) |
| N-(3,4-Dichlorophenyl)-malonamate                 | C <sub>9</sub> H <sub>7</sub> Cl <sub>2</sub> NO <sub>3</sub>                   | [(M+Na)-2H] <sup>-</sup>              | 267.9544  | 0.09 | 0.78 | DOWN | ESI(-) |
| Guanosine 2',3'-cyclic phosphate                  | C <sub>10</sub> H <sub>12</sub> N <sub>5</sub> O <sub>7</sub> P                 | [M-H] <sup>-</sup>                    | 344.0395  | 0.08 | 1.78 | DOWN | ESI(-) |
| Serylcyteine                                      | C <sub>6</sub> H <sub>12</sub> N <sub>2</sub> O <sub>4</sub> S                  | [(M-H)-H <sub>2</sub> O] <sup>-</sup> | 189.03301 | 1.95 | 0.51 | DOWN | ESI(-) |
| Arachidyl palmitate                               | C <sub>36</sub> H <sub>72</sub> O <sub>2</sub>                                  | [M-3H] <sup>-</sup>                   | 177.84367 | 2.47 | 0.42 | UP   | ESI(-) |
| Adenosine 5'-monophosphate                        | C <sub>10</sub> H <sub>14</sub> N <sub>5</sub> O <sub>7</sub> P                 | [M-H] <sup>-</sup>                    | 346.05517 | 0.21 | 0.50 | DOWN | ESI(-) |
| 1-Deoxy-ribitol                                   | C <sub>5</sub> H <sub>12</sub> O <sub>4</sub>                                   | [(M-H)-H <sub>2</sub> O] <sup>-</sup> | 117.05445 | 0.44 | 2.37 | DOWN | ESI(-) |
| Arbutin 6-phosphate                               | C <sub>12</sub> H <sub>17</sub> O <sub>10</sub> P                               | [(M+HCOOH)-H] <sup>-</sup>            | 397.0536  | 0.10 | 5.37 | UP   | ESI(-) |
| (1,2-Dichlorovinyl)glutathione                    | C <sub>12</sub> H <sub>17</sub> Cl <sub>2</sub> N <sub>3</sub> O <sub>6</sub> S | [(M+Na)-2H] <sup>-</sup>              | 421.99864 | 2.27 | 5.38 | UP   | ESI(-) |
| 1-Pyrroline-4-hydroxy-2-carboxylate               | C <sub>5</sub> H <sub>7</sub> NO <sub>3</sub>                                   | [M-H] <sup>-</sup>                    | 128.0341  | 4.48 | 0.43 | DOWN | ESI(-) |
| Galactonic acid                                   | C <sub>6</sub> H <sub>12</sub> O <sub>7</sub>                                   | [M-H] <sup>-</sup>                    | 195.0501  | 1.65 | 0.47 | DOWN | ESI(-) |
| Aspartyl-Proline                                  | C <sub>9</sub> H <sub>14</sub> N <sub>2</sub> O <sub>5</sub>                    | [M-H] <sup>-</sup>                    | 229.08219 | 1.06 | 1.33 | DOWN | ESI(-) |
| 2-Oxoarginine                                     | C <sub>6</sub> H <sub>11</sub> N <sub>3</sub> O <sub>3</sub>                    | [M-H] <sup>-</sup>                    | 172.07164 | 3.30 | 0.47 | DOWN | ESI(-) |
| 2-Keto-glutaramic acid                            | C <sub>5</sub> H <sub>7</sub> NO <sub>4</sub>                                   | [2M-H] <sup>-</sup>                   | 289.06724 | 0.30 | 1.37 | DOWN | ESI(-) |
| Ketoleucine                                       | C <sub>6</sub> H <sub>10</sub> O <sub>3</sub>                                   | [(M-H)-H <sub>2</sub> O] <sup>-</sup> | 129.05456 | 4.61 | 7.69 | DOWN | ESI(-) |
| O-Succinyl-homoserine                             | C <sub>8</sub> H <sub>13</sub> NO <sub>6</sub>                                  | [(M-H)-H <sub>2</sub> O] <sup>-</sup> | 200.05548 | 1.71 | 0.47 | DOWN | ESI(-) |
| Uridine                                           | C <sub>9</sub> H <sub>12</sub> N <sub>2</sub> O <sub>6</sub>                    | [M-H] <sup>-</sup>                    | 243.06162 | 0.44 | 1.29 | DOWN | ESI(-) |
| Citric acid                                       | C <sub>6</sub> H <sub>8</sub> O <sub>7</sub>                                    | [M-H] <sup>-</sup>                    | 191.01882 | 1.79 | 0.78 | DOWN | ESI(-) |
| Threonic Acid                                     | C <sub>4</sub> H <sub>8</sub> O <sub>5</sub>                                    | [(M-H)-H <sub>2</sub> O] <sup>-</sup> | 117.01812 | 5.54 | 1.09 | DOWN | ESI(-) |
| Gamma-glutamyl-ornithine                          | C <sub>10</sub> H <sub>19</sub> N <sub>3</sub> O <sub>5</sub>                   | [M-H] <sup>-</sup>                    | 260.12458 | 0.20 | 0.50 | DOWN | ESI(-) |
| Hydriodic acid                                    | HI                                                                              | [M-H] <sup>-</sup>                    | 126.90385 | 4.74 | 0.46 | DOWN | ESI(-) |
| Leucyl-threonine                                  | C <sub>10</sub> H <sub>20</sub> N <sub>2</sub> O <sub>4</sub>                   | [M-H] <sup>-</sup>                    | 231.13433 | 0.62 | 1.61 | DOWN | ESI(-) |
| Val Pro Ala                                       | C <sub>13</sub> H <sub>23</sub> N <sub>3</sub> O <sub>4</sub>                   | [(M-H)-H <sub>2</sub> O] <sup>-</sup> | 266.15091 | 1.71 | 8.11 | DOWN | ESI(-) |
| Guanosine 2',3'-cyclic phosphate                  | C <sub>10</sub> H <sub>12</sub> N <sub>5</sub> O <sub>7</sub> P                 | [M-H] <sup>-</sup>                    | 344.03943 | 0.35 | 1.85 | DOWN | ESI(-) |
| N2-Acetyl-ornithine                               | C <sub>7</sub> H <sub>14</sub> N <sub>2</sub> O <sub>3</sub>                    | [M-H] <sup>-</sup>                    | 173.09211 | 2.83 | 0.98 | DOWN | ESI(-) |
| Glu Ala                                           | C <sub>8</sub> H <sub>14</sub> N <sub>2</sub> O <sub>5</sub>                    | [(M-H)-H <sub>2</sub> O] <sup>-</sup> | 199.07150 | 1.86 | 1.41 | DOWN | ESI(-) |
| Val Ala Arg                                       | C <sub>14</sub> H <sub>28</sub> N <sub>6</sub> O <sub>4</sub>                   | [M-H] <sup>-</sup>                    | 343.20940 | 0.09 | 2.25 | DOWN | ESI(-) |
| Gly Pro Val                                       | C <sub>12</sub> H <sub>21</sub> N <sub>3</sub> O <sub>4</sub>                   | [M-H] <sup>-</sup>                    | 270.14542 | 0.16 | 1.65 | DOWN | ESI(-) |
| Glutaminylleucine                                 | C <sub>11</sub> H <sub>21</sub> N <sub>3</sub> O <sub>4</sub>                   | [M-H] <sup>-</sup>                    | 258.14549 | 0.44 | 2.84 | DOWN | ESI(-) |
| 2-Picolinic acid                                  | C <sub>6</sub> H <sub>5</sub> NO <sub>2</sub>                                   | [M-H] <sup>-</sup>                    | 122.02357 | 5.10 | 0.74 | DOWN | ESI(-) |
| Leucyl-Alanine                                    | C <sub>9</sub> H <sub>18</sub> N <sub>2</sub> O <sub>3</sub>                    | [M-H] <sup>-</sup>                    | 201.12361 | 1.46 | 2.09 | DOWN | ESI(-) |
| N6-acetyl-lysine                                  | C <sub>8</sub> H <sub>16</sub> N <sub>2</sub> O <sub>3</sub>                    | [M-H] <sup>-</sup>                    | 187.10778 | 2.52 | 0.90 | DOWN | ESI(-) |
| Thymidine                                         | C <sub>10</sub> H <sub>14</sub> N <sub>2</sub> O <sub>5</sub>                   | [M-H] <sup>-</sup>                    | 241.08237 | 0.25 | 2.09 | DOWN | ESI(-) |
| 2-(2-Carboxy-4-methylthiazol-5-yl)ethyl phosphate | C <sub>7</sub> H <sub>10</sub> NO <sub>6</sub> PS                               | [M-H] <sup>-</sup>                    | 265.98834 | 1.74 | 1.13 | DOWN | ESI(-) |
| Inosine                                           | C <sub>10</sub> H <sub>12</sub> N <sub>4</sub> O <sub>5</sub>                   | [M-H] <sup>-</sup>                    | 267.07295 | 0.05 | 2.37 | DOWN | ESI(-) |
| Threonic acid                                     | C <sub>4</sub> H <sub>8</sub> O <sub>5</sub>                                    | [M-H] <sup>-</sup>                    | 135.02875 | 4.31 | 0.62 | UP   | ESI(-) |
| Asparaginyl-Isoleucine                            | C <sub>10</sub> H <sub>19</sub> N <sub>3</sub> O <sub>4</sub>                   | [M-H] <sup>-</sup>                    | 244.12981 | 0.32 | 2.72 | DOWN | ESI(-) |
| Glutamylglycine                                   | C <sub>7</sub> H <sub>12</sub> N <sub>2</sub> O <sub>5</sub>                    | [(M-H)-H <sub>2</sub> O] <sup>-</sup> | 185.05584 | 2.06 | 0.50 | DOWN | ESI(-) |
| 2'-Deoxyuridine                                   | C <sub>9</sub> H <sub>12</sub> N <sub>2</sub> O <sub>5</sub>                    | [M-H] <sup>-</sup>                    | 227.06665 | 0.59 | 0.98 | DOWN | ESI(-) |
| Uridine 5'-diphosphate                            | C <sub>9</sub> H <sub>14</sub> N <sub>2</sub> O <sub>12</sub> P <sub>2</sub>    | [(M-H)-H <sub>2</sub> O] <sup>-</sup> | 384.98185 | 5.05 | 7.14 | DOWN | ESI(-) |
| Malic acid                                        | C <sub>4</sub> H <sub>6</sub> O <sub>5</sub>                                    | [(M-H)-H <sub>2</sub> O] <sup>-</sup> | 115.00247 | 5.67 | 0.50 | UP   | ESI(-) |
| O-Acetylserine                                    | C <sub>13</sub> H <sub>21</sub> N <sub>2</sub> O <sub>7</sub> PS                | [M+2H] <sup>+</sup>                   | 191.04840 | 1.18 | 0.70 | DOWN | ESI(+) |

|                                         |                                                                 |                                        |           |      |       |      |         |
|-----------------------------------------|-----------------------------------------------------------------|----------------------------------------|-----------|------|-------|------|---------|
| 1-Stearoylglycerophosphoglycerol        | C <sub>24</sub> H <sub>49</sub> O <sub>9</sub> P                | [M+H] <sup>+</sup>                     | 513.31916 | 0.14 | 6.18  | DOWN | ESI (+) |
| N5-Acetyl-N2-gamma-glutamyl-L-ornithine | C <sub>12</sub> H <sub>21</sub> N <sub>3</sub> O <sub>6</sub>   | [(M+H)-H <sub>2</sub> O] <sup>+</sup>  | 286.13940 | 3.09 | 0.50  | DOWN | ESI (+) |
| Guanosine 2',3'-cyclic phosphate        | C <sub>10</sub> H <sub>12</sub> N <sub>5</sub> O <sub>7</sub> P | [M+H] <sup>+</sup>                     | 346.05428 | 2.79 | 1.80  | DOWN | ESI (+) |
| Adenosine 2'-phosphate                  | C <sub>10</sub> H <sub>14</sub> N <sub>5</sub> O <sub>7</sub> P | [M+H] <sup>+</sup>                     | 348.06987 | 2.94 | 0.86  | DOWN | ESI (+) |
| N5-Hydroxy-ornithine                    | C <sub>5</sub> H <sub>12</sub> N <sub>2</sub> O <sub>3</sub>    | [(M+H)-H <sub>2</sub> O] <sup>+</sup>  | 131.08167 | 2.85 | 0.47  | UP   | ESI (+) |
| Guanine                                 | C <sub>5</sub> H <sub>5</sub> N <sub>5</sub> O                  | [M+H] <sup>+</sup>                     | 152.05664 | 4.14 | 0.78  | UP   | ESI (+) |
| Adenosine 2',3'-cyclic phosphate        | C <sub>10</sub> H <sub>12</sub> N <sub>5</sub> O <sub>6</sub> P | [M+H] <sup>+</sup>                     | 330.05936 | 2.94 | 1.98  | DOWN | ESI (+) |
| Pyridoxine                              | C <sub>8</sub> H <sub>11</sub> NO <sub>3</sub>                  | [M+H] <sup>+</sup>                     | 170.08117 | 3.14 | 0.54  | UP   | ESI (+) |
| Pantothenate                            | C <sub>9</sub> H <sub>17</sub> NO <sub>5</sub>                  | [M+H] <sup>+</sup>                     | 220.11785 | 2.90 | 2.94  | DOWN | ESI (+) |
| 6-Deoxy-glucose                         | C <sub>6</sub> H <sub>12</sub> O <sub>5</sub>                   | [M+H] <sup>+</sup>                     | 165.07572 | 3.43 | 5.37  | UP   | ESI (+) |
| Asn Arg                                 | C <sub>10</sub> H <sub>20</sub> N <sub>6</sub> O <sub>4</sub>   | [(M+H)-H <sub>2</sub> O] <sup>+</sup>  | 271.15292 | 3.93 | 1.83  | DOWN | ESI (+) |
| Ethanolamine                            | C <sub>2</sub> H <sub>7</sub> NO                                | [M+H] <sup>+</sup>                     | 62.060602 | 0.35 | 0.47  | DOWN | ESI (+) |
| Indoleacetic acid                       | C <sub>10</sub> H <sub>9</sub> NO <sub>2</sub>                  | [M+H] <sup>+</sup>                     | 176.07052 | 3.56 | 5.08  | DOWN | ESI (+) |
| 5-Methyltetrahydropteroyltri-glutamate  | C <sub>25</sub> H <sub>36</sub> N <sub>8</sub> O <sub>12</sub>  | [M+2H] <sup>+</sup>                    | 321.13042 | 0.10 | 5.37  | UP   | ESI (+) |
| Glutamine                               | C <sub>5</sub> H <sub>10</sub> N <sub>2</sub> O <sub>3</sub>    | [(M+H)-H <sub>2</sub> O] <sup>+</sup>  | 275.13463 | 3.03 | 1.05  | DOWN | ESI (+) |
| Glutamate                               | C <sub>5</sub> H <sub>9</sub> NO <sub>4</sub>                   | [M+H] <sup>+</sup>                     | 148.06038 | 4.01 | 0.47  | DOWN | ESI (+) |
| Malyl N-acetyl-alpha-glucosaminide      | C <sub>12</sub> H <sub>19</sub> NO <sub>10</sub>                | [M+H] <sup>+</sup>                     | 338.10763 | 3.21 | 5.36  | UP   | ESI (+) |
| 2-Hydroxy-2-methylbutanenitrile         | C <sub>5</sub> H <sub>9</sub> NO                                | [(2M+H)-H <sub>2</sub> O] <sup>+</sup> | 181.13370 | 2.18 | 3.92  | DOWN | ESI (+) |
| N-Acetyl-hexosamine                     | C <sub>8</sub> H <sub>15</sub> NO <sub>6</sub>                  | [(M+H)-H <sub>2</sub> O] <sup>+</sup>  | 204.08663 | 2.73 | 0.48  | DOWN | ESI (+) |
| Leu Phe                                 | C <sub>15</sub> H <sub>22</sub> N <sub>2</sub> O <sub>3</sub>   | [(M+2Na)-H] <sup>+</sup>               | 323.13589 | 3.54 | 5.33  | UP   | ESI (+) |
| 7-Methyladenine                         | C <sub>6</sub> H <sub>7</sub> N <sub>5</sub>                    | [2M+H] <sup>+</sup>                    | 299.14852 | 1.42 | 5.36  | UP   | ESI (+) |
| gamma-Glutamyl-2-aminobutyrate          | C <sub>9</sub> H <sub>16</sub> N <sub>2</sub> O <sub>5</sub>    | [(M+H)-H <sub>2</sub> O] <sup>+</sup>  | 215.10237 | 3.74 | 0.51  | UP   | ESI (+) |
| Acetyl-2-hydroxy-butanonic acid         | C <sub>6</sub> H <sub>10</sub> O <sub>4</sub>                   | [(M+H)-H <sub>2</sub> O] <sup>+</sup>  | 129.05471 | 3.44 | 7.16  | UP   | ESI (+) |
| Pyroglutamyl valine                     | C <sub>10</sub> H <sub>16</sub> N <sub>2</sub> O <sub>4</sub>   | [M+H] <sup>+</sup>                     | 229.11806 | 3.33 | 0.50  | UP   | ESI (+) |
| Hydroxyacetone                          | C <sub>3</sub> H <sub>6</sub> O <sub>2</sub>                    | [M+K] <sup>+</sup>                     | 113.00012 | 3.17 | 0.47  | DOWN | ESI (+) |
| Met-Val-OH                              | C <sub>15</sub> H <sub>20</sub> N <sub>2</sub> O <sub>6</sub> S | [(M+H)-H <sub>2</sub> O] <sup>+</sup>  | 339.10188 | 1.24 | 5.36  | UP   | ESI (+) |
| Pantothenamide                          | C <sub>9</sub> H <sub>18</sub> N <sub>2</sub> O <sub>4</sub>    | [M+H] <sup>+</sup>                     | 219.13376 | 3.24 | 0.50  | DOWN | ESI (+) |
| 4-Aminobutanoate                        | C <sub>4</sub> H <sub>9</sub> NO <sub>2</sub>                   | [(M+H)-H <sub>2</sub> O] <sup>+</sup>  | 86.060484 | 1.11 | 9.44  | DOWN | ESI (+) |
| N-Acetylproline                         | C <sub>7</sub> H <sub>11</sub> NO <sub>3</sub>                  | [M+H] <sup>+</sup>                     | 158.08118 | 3.34 | 0.47  | UP   | ESI (+) |
| N-palmitoyl tyrosine                    | C <sub>25</sub> H <sub>41</sub> NO <sub>4</sub>                 | [(M+H)+2K] <sup>+</sup>                | 166.07902 | 3.42 | 5.36  | UP   | ESI (+) |
| 2-Oxoarginine                           | C <sub>6</sub> H <sub>11</sub> N <sub>3</sub> O <sub>3</sub>    | [M+H] <sup>+</sup>                     | 174.08727 | 3.35 | 0.54  | UP   | ESI (+) |
| Pantoate                                | C <sub>6</sub> H <sub>12</sub> O <sub>4</sub>                   | [(M+2Na)-H] <sup>+</sup>               | 193.04429 | 5.04 | 0.70  | DOWN | ESI (+) |
| 5-Hydroxykynurenamine                   | C <sub>9</sub> H <sub>12</sub> N <sub>2</sub> O <sub>2</sub>    | [M+H] <sup>+</sup>                     | 181.09708 | 3.40 | 2.53  | DOWN | ESI (+) |
| Aminoacetone                            | C <sub>3</sub> H <sub>7</sub> NO                                | [(M+H)-H <sub>2</sub> O] <sup>+</sup>  | 56.05009  | 1.30 | 12.77 | DOWN | ESI (+) |
| N-Acetylcadaverine                      | C <sub>7</sub> H <sub>16</sub> N <sub>2</sub> O                 | [M+H] <sup>+</sup>                     | 145.13358 | 3.79 | 0.87  | DOWN | ESI (+) |
| Triethylamine                           | C <sub>6</sub> H <sub>15</sub> N                                | [M+H] <sup>+</sup>                     | 102.12796 | 2.77 | 10.02 | DOWN | ESI (+) |
| Asn-Arg                                 | C <sub>10</sub> H <sub>20</sub> N <sub>6</sub> O <sub>4</sub>   | [(M+H)-H <sub>2</sub> O] <sup>+</sup>  | 271.15176 | 0.41 | 0.51  | DOWN | ESI (+) |
| Imidazolepropionic acid                 | C <sub>6</sub> H <sub>8</sub> N <sub>2</sub> O <sub>2</sub>     | [(M+H)-H <sub>2</sub> O] <sup>+</sup>  | 123.05543 | 3.30 | 1.17  | DOWN | ESI (+) |
| N-Acetylputrescine                      | C <sub>6</sub> H <sub>14</sub> N <sub>2</sub> O                 | [(M+H)-H <sub>2</sub> O] <sup>+</sup>  | 113.10756 | 2.72 | 0.47  | UP   | ESI (+) |
| Homoserine lactone                      | C <sub>4</sub> H <sub>7</sub> NO <sub>2</sub>                   | [(M+H)-H <sub>2</sub> O] <sup>+</sup>  | 84.044834 | 1.13 | 0.47  | DOWN | ESI (+) |
| Adenine                                 | C <sub>5</sub> H <sub>5</sub> N <sub>5</sub>                    | [M+H] <sup>+</sup>                     | 136.06174 | 4.20 | 3.70  | DOWN | ESI (+) |
| Cytosine                                | C <sub>4</sub> H <sub>5</sub> N <sub>3</sub> O                  | [M+H] <sup>+</sup>                     | 112.05080 | 2.43 | 0.82  | DOWN | ESI (+) |

|                                        |                                                                  |                                        |           |      |      |      |         |
|----------------------------------------|------------------------------------------------------------------|----------------------------------------|-----------|------|------|------|---------|
| Cadaverine                             | C <sub>5</sub> H <sub>14</sub> N <sub>2</sub>                    | [M+H] <sup>+</sup>                     | 103.12328 | 2.24 | 0.43 | UP   | ESI (+) |
| LysoPA(i-19:0/0:0)                     | C <sub>22</sub> H <sub>45</sub> O <sub>7</sub> P                 | [M+2H] <sup>+</sup>                    | 227.15219 | 3.40 | 2.23 | UP   | ESI (+) |
| 3-Butyn-1-al                           | C <sub>4</sub> H <sub>4</sub> O                                  | [M+H] <sup>+</sup>                     | 69.034038 | 0.12 | 5.37 | UP   | ESI (+) |
| Thiamine monophosphate                 | C <sub>12</sub> H <sub>17</sub> N <sub>4</sub> O <sub>4</sub> PS | [M+2H] <sup>+</sup>                    | 173.04204 | 6.84 | 0.47 | DOWN | ESI (+) |
| Homophenylalanine                      | C <sub>10</sub> H <sub>13</sub> NO <sub>2</sub>                  | [M+H] <sup>+</sup>                     | 180.10186 | 3.27 | 3.70 | DOWN | ESI (+) |
| Putrescine                             | C <sub>4</sub> H <sub>12</sub> N <sub>2</sub>                    | [M+H] <sup>+</sup>                     | 89.10775  | 1.34 | 0.43 | UP   | ESI (+) |
| N-Carbamoylputrescine                  | C <sub>5</sub> H <sub>13</sub> N <sub>3</sub> O                  | [(M+H)-H <sub>2</sub> O] <sup>+</sup>  | 114.10284 | 2.41 | 0.47 | DOWN | ESI (+) |
| 5-amino-pentanoic acid                 | C <sub>5</sub> H <sub>11</sub> NO <sub>2</sub>                   | [(M+H)-H <sub>2</sub> O] <sup>+</sup>  | 100.07600 | 2.20 | 0.50 | DOWN | ESI (+) |
| gamma-Glutamyl-beta-aminopropionitrile | C <sub>8</sub> H <sub>13</sub> N <sub>3</sub> O <sub>3</sub>     | [M+Na] <sup>+</sup>                    | 222.08471 | 3.36 | 0.70 | UP   | ESI (+) |
| 4-Hydroxyphenylglycine                 | C <sub>8</sub> H <sub>9</sub> NO <sub>3</sub>                    | [M+H] <sup>+</sup>                     | 168.06547 | 3.46 | 0.90 | UP   | ESI (+) |
| Uracil                                 | C <sub>4</sub> H <sub>4</sub> N <sub>2</sub> O <sub>2</sub>      | [M+H] <sup>+</sup>                     | 113.03476 | 2.99 | 2.05 | DOWN | ESI (+) |
| Phenylpyruvic acid                     | C <sub>9</sub> H <sub>8</sub> O <sub>3</sub>                     | [M+H] <sup>+</sup>                     | 165.05456 | 3.59 | 8.01 | DOWN | ESI (+) |
| Guanosine                              | C <sub>10</sub> H <sub>13</sub> N <sub>5</sub> O <sub>5</sub>    | [M+H] <sup>+</sup>                     | 284.09845 | 3.64 | 2.43 | DOWN | ESI (+) |
| Valine                                 | C <sub>5</sub> H <sub>11</sub> NO <sub>2</sub>                   | [M+H] <sup>+</sup>                     | 118.08642 | 3.18 | 0.47 | DOWN | ESI (+) |
| 3-Cyanoalanine                         | C <sub>4</sub> H <sub>6</sub> N <sub>2</sub> O <sub>2</sub>      | [(2M+H)-H <sub>2</sub> O] <sup>+</sup> | 211.08268 | 2.08 | 0.50 | DOWN | ESI (+) |
| D-Alanyl-D-alanine                     | C <sub>6</sub> H <sub>12</sub> N <sub>2</sub> O <sub>3</sub>     | [M+H] <sup>+</sup>                     | 161.09206 | 3.37 | 0.50 | DOWN | ESI (+) |
| Threonine                              | C <sub>4</sub> H <sub>9</sub> NO <sub>3</sub>                    | [(M+H)-H <sub>2</sub> O] <sup>+</sup>  | 102.05526 | 2.26 | 0.47 | DOWN | ESI (+) |
| 5-Aminopentanamide                     | C <sub>5</sub> H <sub>12</sub> N <sub>2</sub> O                  | [M+H] <sup>+</sup>                     | 117.10239 | 3.27 | 0.49 | DOWN | ESI (+) |
| Alanyl-Leucine                         | C <sub>9</sub> H <sub>18</sub> N <sub>2</sub> O <sub>3</sub>     | [M+H] <sup>+</sup>                     | 203.13897 | 2.87 | 2.75 | DOWN | ESI (+) |
| Lysine                                 | C <sub>6</sub> H <sub>14</sub> N <sub>2</sub> O <sub>2</sub>     | [M+H] <sup>+</sup>                     | 147.11277 | 3.89 | 0.43 | DOWN | ESI (+) |
| N-Butyryl-homoserine lactone           | C <sub>8</sub> H <sub>11</sub> NO                                | [(M+H)-H <sub>2</sub> O] <sup>+</sup>  | 136.07569 | 3.96 | 3.74 | DOWN | ESI (+) |
| Biotin sulfoxide                       | C <sub>10</sub> H <sub>16</sub> N <sub>2</sub> O <sub>4</sub> S  | [M+H] <sup>+</sup>                     | 261.08995 | 3.62 | 2.09 | UP   | ESI (+) |
| Thymine                                | C <sub>5</sub> H <sub>6</sub> N <sub>2</sub> O <sub>2</sub>      | [M+H] <sup>+</sup>                     | 127.05031 | 3.44 | 2.75 | DOWN | ESI (+) |
| Arginine                               | C <sub>6</sub> H <sub>14</sub> N <sub>4</sub> O <sub>2</sub>     | [(M+H)-H <sub>2</sub> O] <sup>+</sup>  | 157.10836 | 3.56 | 0.70 | UP   | ESI (+) |
| N2-Succinyl-ornithine                  | C <sub>9</sub> H <sub>16</sub> N <sub>2</sub> O <sub>5</sub>     | [(M+H)-H <sub>2</sub> O] <sup>+</sup>  | 197.09200 | 3.05 | 3.30 | DOWN | ESI (+) |
| Tyramine                               | C <sub>8</sub> H <sub>11</sub> NO                                | [(M+H)-H <sub>2</sub> O] <sup>+</sup>  | 120.08091 | 3.34 | 2.94 | DOWN | ESI (+) |
| beta-Alanyl-arginine                   | C <sub>9</sub> H <sub>19</sub> N <sub>5</sub> O <sub>3</sub>     | [(M+H)-H <sub>2</sub> O] <sup>+</sup>  | 228.14533 | 3.07 | 0.98 | DOWN | ESI (+) |
| Betaine                                | C <sub>5</sub> H <sub>11</sub> NO <sub>2</sub>                   | [(2M+H)-H <sub>2</sub> O] <sup>+</sup> | 217.15451 | 3.26 | 2.39 | DOWN | ESI (+) |
| Ornithine                              | C <sub>5</sub> H <sub>12</sub> N <sub>2</sub> O <sub>2</sub>     | [(M+H)-H <sub>2</sub> O] <sup>+</sup>  | 115.08673 | 3.41 | 0.47 | DOWN | ESI (+) |
| N-gamma-Glutamylglutamine              | C <sub>10</sub> H <sub>17</sub> N <sub>3</sub> O <sub>6</sub>    | [(M+H)-H <sub>2</sub> O] <sup>+</sup>  | 258.10816 | 3.20 | 0.87 | DOWN | ESI (+) |

\*RT: retention time.

Table S4. Antimicrobial activity of EOs on *Salmonella enterica* serovar Enteritidis ATCC 13076.

| Code | Plant species                                         | <i>Salmonella</i> Enteritidis ATCC 13076 |             |
|------|-------------------------------------------------------|------------------------------------------|-------------|
|      |                                                       | MIC <sub>50</sub> (mg/mL)                | MBC (mg/mL) |
| SA   | <i>Steiractinia aspera</i> Cuatrec.                   | > 1.5                                    | > 1.5       |
| TD-I | <i>Turnera diffusa</i> Willd                          | > 1.5                                    | > 1.5       |
| LOP  | <i>Lippia origanoides</i> H.B.K quimiotipo felandreno | > 1.5                                    | > 1.5       |



| Code   | Plant species                                                  | <i>Salmonella</i> Enteritidis ATCC 13076 |             |
|--------|----------------------------------------------------------------|------------------------------------------|-------------|
|        |                                                                | MIC <sub>50</sub> (mg/mL)                | MBC (mg/mL) |
| CM-I   | <i>Calycolpus moritzianus</i> Burret                           | > 1.5                                    | > 1.5       |
| PA     | <i>Piper aduncum</i> Lam                                       | > 1.5                                    | > 1.5       |
| EQ     | <i>Elaphandra quinquenervis</i> H.Rob                          | > 1.5                                    | > 1.5       |
| HD     | <i>Hyptis dilatata</i> Benth                                   | > 1.5                                    | > 1.5       |
| LOC    | <i>L. origanoides</i> H.B.K quimiotipo carvacrol               | 0.75 ± 0.0041                            | 1.5         |
| LOCpT  | <i>L. origanoides</i> H.B.K quimiotipo β-cariofileno-timol     | > 1.5                                    | > 1.5       |
| LOT-I  | <i>L. origanoides</i> H.B.K quimiotipo timol                   | > 1.5                                    | > 1.5       |
| TD-II  | <i>T. diffusa</i> Willd                                        | > 1.5                                    | > 1.5       |
| SV     | <i>Satureja viminea</i> (L.) Kuntze                            | > 1.5                                    | > 1.5       |
| PS     | <i>Psidium sartorianum</i> (O.Berg) Nied                       | > 1.5                                    | > 1.5       |
| VC     | <i>Varronia curassavica</i> Jacq.                              | > 1.5                                    | > 1.5       |
| OB     | <i>Ocimum basilicum</i> L.                                     | > 1.5                                    | > 1.5       |
| CM-II  | <i>C. moritzianus</i> Burret                                   | > 1.5                                    | > 1.5       |
| TD-III | <i>T. diffusa</i> Willd                                        | > 1.5                                    | > 1.5       |
| LOTC   | <i>L. origanoides</i> H.B.K quimiotipo timol- <i>p</i> -cimeno | 0.37 ± 0.0070                            | 0.75        |
| LOT-II | <i>L. origanoides</i> H.B.K quimiotipo timol                   | 0.37 ± 0.0043                            | 0.75        |
| LM     | <i>L. micromera</i> Schauer                                    | > 1.5                                    | > 1.5       |

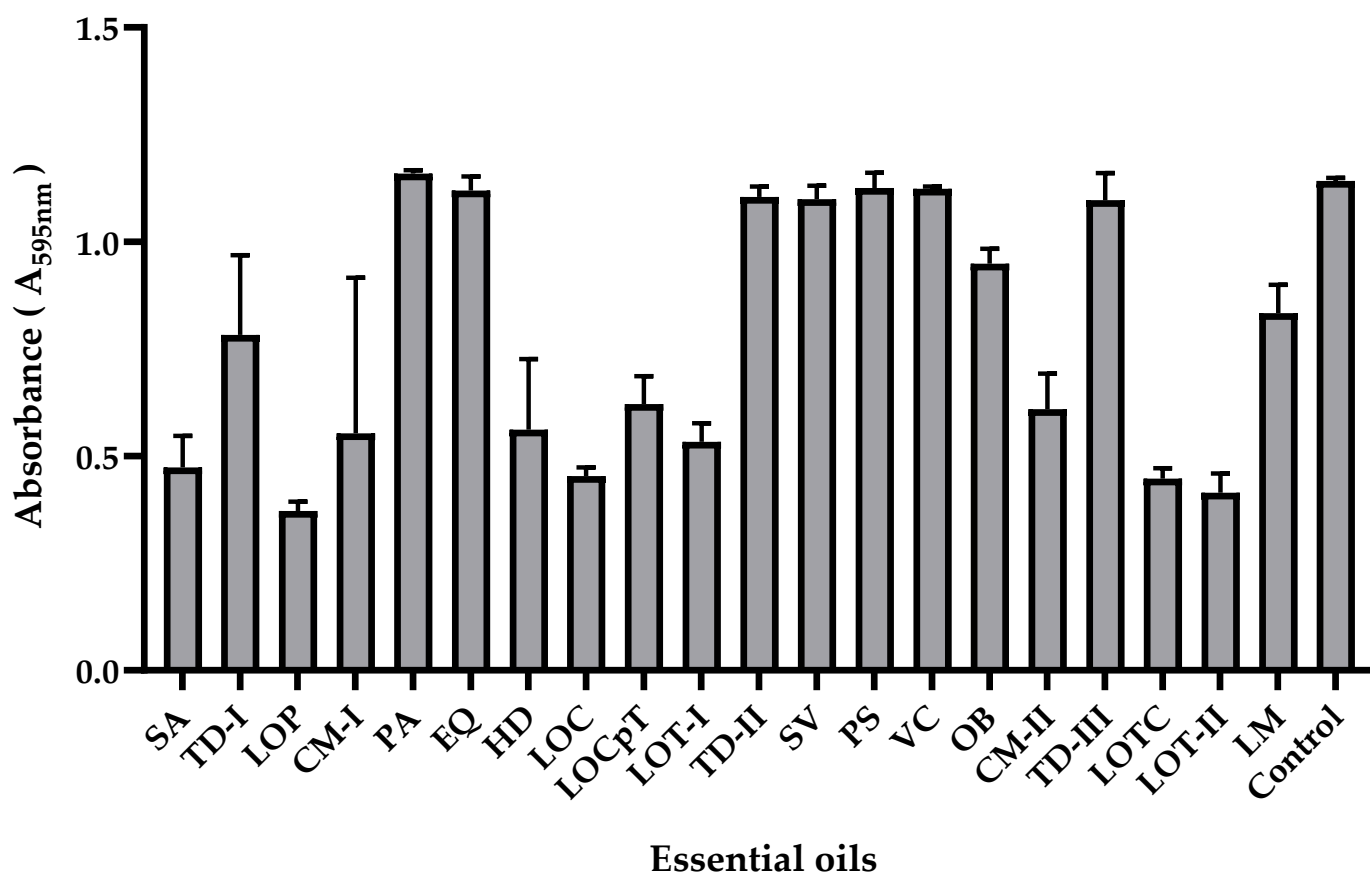

**Figure S1.** Anti-biofilm activity of different essential oils on *Salmonella enterica* serovar Enteritidis ATCC 13076. The concentrations evaluated were as follows: EOs SA, TD-I, LOP, CM-I, PA, EQ, HD, TD-II, SV, PS, VC, OB, CM-II, and TD-III at 1.5 mg/mL; LOCpT and LM at 0.75 mg/mL; LOC and LOT-I at 0.18 mg/mL; LOTc and LOT-II at 0.13 mg/mL.
